# Supplementary material for: Material Basis Elucidation and Quantification of Dandelion through Spectrum–Effect Relationship Study between UHPLC Fingerprint and Antioxidant Activity via Multivariate Statistical Analysis
Source: MDPI journal article supplement (doi:10.3390/molecules27092632), 2022-04-20
Supplement: s1 [file s1]

# Supplementary Materials

## Material Basis Elucidation and Quantification of Dandelion through Spectrum–Effect Relationship Study between UHPLC Fingerprint and Antioxidant Activity via Multivariate Statistical Analysis

Ziru Liu <sup>1</sup>, Jiameng Qu <sup>2</sup>, Fan Ke <sup>1</sup>, Haotian Zhang <sup>3</sup>, Yiwen Zhang <sup>1</sup>, Qian Zhang <sup>1</sup>, Qing Li <sup>1</sup>, Kaishun Bi <sup>1</sup> and Huarong Xu <sup>1,\*</sup>

<sup>1</sup> National and Local Joint Engineering Laboratory for Key Technology of Chinese Material Medica Quality Control, School of Pharmacy, Shenyang Pharmaceutical University, Shenyang 110016, China; viola18309805460@163.com (Z.L.); 18841420353@163.com (F.K.); zzzzyywen@outlook.com (Y.Z.); zhangqian@syphu.edu.cn (Q.Z.); lqyxm@hotmail.com (Q.L.); kaishunbi.syphu@gmail.com (K.B.)

<sup>2</sup> School of Traditional Chinese Material Medica, Shenyang Pharmaceutical University, Shenyang 110016, China; qujiameng0519@163.com

<sup>3</sup> School of Life Science and Biopharmaceutics, Shenyang Pharmaceutical University, Shenyang 110016, China; zhanghaotian2087@163.com

\* Correspondence: xuh@syphu.edu.cn; Tel.: +86-24-43-520-588

TABLE S1. Correlation coefficient of 24 chromatographic peaks with antioxidant capacity of PLSR(FRAP)

| No.     | correlation | No.     | correlation |
|---------|-------------|---------|-------------|
| Peak 1  | 0.082468    | Peak 13 | 0.005224    |
| Peak 2  | 0.085474    | Peak 14 | 0.08559     |
| Peak 3  | 0.055967    | Peak 15 | -0.00518    |
| Peak 4  | 0.071585    | Peak 16 | 0.05557     |
| Peak 5  | 0.060765    | Peak 17 | 0.062259    |
| Peak 6  | 0.079032    | Peak 18 | 0.011582    |
| Peak 7  | 0.002903    | Peak 19 | 0.064768    |
| Peak 8  | 0.083874    | Peak 20 | 0.03043     |
| Peak 9  | 0.053145    | Peak 21 | 0.013008    |
| Peak 10 | 0.053513    | Peak 22 | -0.00481    |
| Peak 11 | -0.00553    | Peak 23 | -0.03533    |
| Peak 12 | 0.059264    | Peak 24 | -0.03475    |

**TABLE S2. VIP value of 24 chromatographic peaks with antioxidant capacity of PLSR (FRAP)**

| No.     | VIP     | No.     | VIP      |
|---------|---------|---------|----------|
| Peak 14 | 1.57558 | Peak 10 | 0.9851   |
| Peak 2  | 1.57345 | Peak 9  | 0.978312 |
| Peak 8  | 1.544   | Peak 23 | 0.650324 |
| Peak 1  | 1.51812 | Peak 24 | 0.639667 |
| Peak 6  | 1.45486 | Peak 20 | 0.560168 |
| Peak 4  | 1.31777 | Peak 21 | 0.239459 |
| Peak 19 | 1.19229 | Peak 18 | 0.21321  |
| Peak 17 | 1.1461  | Peak 11 | 0.101803 |
| Peak 5  | 1.1186  | Peak 13 | 0.096163 |
| Peak 12 | 1.09096 | Peak 15 | 0.0953   |
| Peak 3  | 1.03026 | Peak 22 | 0.088537 |
| Peak 16 | 1.02297 | Peak 7  | 0.053438 |

**TABLE S3. Correlation coefficient of 24 chromatographic peaks with antioxidant capacity of PLSR (ABTS)**

| No.     | correlation | No.     | correlation |
|---------|-------------|---------|-------------|
| Peak 1  | 0.043545    | Peak 13 | 0.009201    |
| Peak 2  | 0.052681    | Peak 14 | 0.07557     |
| Peak 3  | 0.021075    | Peak 15 | -0.02444    |
| Peak 4  | 0.039848    | Peak 16 | 0.041669    |
| Peak 5  | 0.046334    | Peak 17 | 0.050885    |
| Peak 6  | 0.032191    | Peak 18 | -0.00216    |
| Peak 7  | -0.03036    | Peak 19 | 0.06685     |
| Peak 8  | 0.055384    | Peak 20 | 0.058953    |
| Peak 9  | 0.046202    | Peak 21 | -0.03409    |
| Peak 10 | 0.043483    | Peak 22 | -0.01404    |
| Peak 11 | -0.03762    | Peak 23 | -0.03356    |
| Peak 12 | 0.028464    | Peak 24 | -0.04028    |

**TABLE S4. VIP value of 24 chromatographic peaks with antioxidant capacity of PLSR (ABTS)**

| No.     | VIP      | No.     | VIP      |
|---------|----------|---------|----------|
| Peak 14 | 1.78735  | Peak 4  | 0.942484 |
| Peak 19 | 1.58112  | Peak 11 | 0.889849 |
| Peak 20 | 1.39433  | Peak 21 | 0.806381 |
| Peak 8  | 1.30993  | Peak 23 | 0.79382  |
| Peak 2  | 1.246    | Peak 6  | 0.761371 |
| Peak 17 | 1.20353  | Peak 7  | 0.718094 |
| Peak 5  | 1.09587  | Peak 12 | 0.673218 |
| Peak 9  | 1.09277  | Peak 15 | 0.57805  |
| Peak 1  | 1.02992  | Peak 3  | 0.498459 |
| Peak 10 | 1.02844  | Peak 22 | 0.332137 |
| Peak 16 | 0.985551 | Peak 13 | 0.217625 |
| Peak 24 | 0.952672 | Peak 18 | 0.051104 |
